# Supplementary material for: Clinical Application of a Multiplex Droplet Digital PCR in the Rapid Diagnosis of Children with Suspected Bloodstream Infections
Source: MDPI journal article supplement (doi:10.3390/pathogens12050719), 2023-05-16
Supplement: s1 [file s1]

**Supplementary Table S1.** Detailed clinical information of BC-/ddPCR<sup>+</sup> samples.

| Number              | ddPCR results                      | Anti-bacterial agents                                                                                                                         | Culture results of other sites                                                                                                                                                                                  | Clinical diagnosis                                                                                       | Laboratory examination                                                 |
|---------------------|------------------------------------|-----------------------------------------------------------------------------------------------------------------------------------------------|-----------------------------------------------------------------------------------------------------------------------------------------------------------------------------------------------------------------|----------------------------------------------------------------------------------------------------------|------------------------------------------------------------------------|
| <b>Probable BSI</b> |                                    |                                                                                                                                               |                                                                                                                                                                                                                 |                                                                                                          |                                                                        |
| 17                  | <i>Klebsiella</i>                  | Ceftazidime<br>Itraconazole<br>Sulfamethoxazole (SMZ)<br>Caspofungin<br>Isopamicin<br>Sulperazon<br>Vancomycin<br>Tigecycline<br>Voriconazole | <i>Klebsiella pneumoniae</i><br>(endotracheal tube)<br><i>CRKP</i> (faeces)                                                                                                                                     | Acute hemorrhagic<br>necrotizing pancreatitis<br>Severe pneumonia<br>Acute lymphocytic<br>leukemia (ALL) | WBC (10 <sup>9</sup> /L):0.39<br>CRP (mg/L):139<br>PCT (µg/L): <0.05   |
| 20                  | <i>Streptococcus</i><br><i>EBV</i> | Meropenem<br>Vancomycin                                                                                                                       | <i>Methicillin-resistant</i><br><i>Staphylococcus aureus</i> (MRSA,<br>throat swab)<br><i>C. albicans</i> (sputum)<br><i>S. aureus</i> (sputum)<br><i>S. anginosus</i> (hydrothorax)<br><i>E. coli</i> (faeces) | Sepsis<br>Septic shock<br>Pyopneumothorax<br>Severe pneumonia                                            | WBC (10 <sup>9</sup> /L):10.15<br>CRP (mg/L): >170<br>PCT (µg/L):27.52 |
| 53                  | <i>E. coli</i>                     | Sulperazon<br>Vancomycin                                                                                                                      | <i>Enterobacteriaceae</i> (faeces)<br><i>Enterococcus</i> (faeces)                                                                                                                                              | Sepsis<br>Bacterial pneumonia<br>Hepatoblastoma                                                          | WBC (10 <sup>9</sup> /L):1.08<br>CRP (mg/L): 88<br>PCT (µg/L): 0.16    |
| 59                  | <i>Klebsiella</i>                  | Sulperazon                                                                                                                                    | <i>E. asburiae</i> (pus)                                                                                                                                                                                        | Sepsis                                                                                                   | WBC (10 <sup>9</sup> /L):0.24                                          |

|                     |                      |                                |                                                                  |                                   |                                |
|---------------------|----------------------|--------------------------------|------------------------------------------------------------------|-----------------------------------|--------------------------------|
| 62                  | <i>Streptococcus</i> | Vancomycin                     | <i>S. viridans</i> (throat swab)                                 | Bronchopneumonia                  | CRP (mg/L): 57                 |
|                     | CoNS                 |                                |                                                                  | Retinoblastoma                    | PCT (µg/L): 0.37               |
|                     | <i>Klebsiella</i>    | Sulperazon                     | <i>Klebsiella pneumoniae</i> (oral fluid)                        | Sepsis                            | WBC (10 <sup>9</sup> /L):0.43  |
| <b>Possible BSI</b> |                      | Vancomycin                     | <i>Enterobacteriaceae</i> (faeces)                               | Intestinal infection              | CRP (mg/L): 98                 |
|                     |                      | Fluconazole                    | <i>Enterococcus</i> (faeces)                                     | ALL                               | PCT (µg/L): 2.91               |
|                     |                      |                                |                                                                  |                                   |                                |
| 1                   | <i>Bacteroides</i>   | Meropenem                      | <i>Proteobacteria</i> (faeces)                                   | Neuroblastoma                     | WBC (10 <sup>9</sup> /L):0.46  |
|                     | <i>fragilis</i>      | Vancomycin                     | <i>C.albicans</i> (faeces)                                       | Respiratory tract infection (RTI) | CRP (mg/L):123                 |
|                     | VZV                  | Itraconazole                   |                                                                  | Autoimmuneencephalitis (AE)       | PCT (µg/L):3.85                |
| 2                   | CoNS                 | Isopamicin                     | <i>P. Aeruginosa</i> (sputum, endotracheal intubation)           | Medulloblastoma                   | WBC (10 <sup>9</sup> /L):3.27  |
|                     |                      | Levofloxacin                   |                                                                  | Pneumonia                         | CRP (mg/L):6                   |
|                     |                      | Itraconazole                   |                                                                  | Central respiratory failure       | PCT (µg/L): <0.02              |
| 8                   | <i>Klebsiella</i>    | Meropenem                      | <i>P. Aeruginosa</i> (hydrocele)                                 | Epididymitis                      | WBC (10 <sup>9</sup> /L):39.79 |
|                     | <i>E. coli</i>       | Vancomycin                     |                                                                  |                                   | CRP (mg/L):60                  |
|                     |                      |                                |                                                                  |                                   | PCT (µg/L):2.26                |
| 16                  | <i>A. Baumanii</i>   | Isopamicin                     | <i>Carbapenem-resistant Klebsiella pneumoniae</i> (CRKP, faeces) | Sepsis                            | WBC (10 <sup>9</sup> /L):0.27  |
|                     | CoNS                 | Imipenem and Cilastatin Sodium | <i>P. Aeruginosa</i> (faeces)                                    | Pneumonia                         | CRP (mg/L):81                  |
|                     |                      | Linezolid                      |                                                                  | Acute monocytic leukemia (AML)    | PCT (µg/L):0.06                |
|                     |                      | Voriconazole                   |                                                                  |                                   |                                |
|                     |                      | Tigecycline                    |                                                                  |                                   |                                |
| 21                  | <i>Streptococcus</i> | Isopamicin                     | <i>Enterobacteriaceae</i> (faeces)                               | Sepsis                            | WBC (10 <sup>9</sup> /L):16.9  |
|                     |                      | Sulperazon                     | <i>Enterococcus</i> (faeces)                                     | Septic shock                      | CRP (mg/L): 104                |

|    |                      |                                       |                                                 |                                                |                                |
|----|----------------------|---------------------------------------|-------------------------------------------------|------------------------------------------------|--------------------------------|
|    |                      | Tigecycline                           | <i>A. Baumanii</i> (sputum)                     | Osteosarcoma                                   | PCT (µg/L):0.74                |
|    |                      | Fluconazole                           |                                                 |                                                |                                |
| 26 | <i>Klebsiella</i>    | Vancomycin                            | <i>S. viridans</i> (throat swab)                | Sepsis                                         | WBC (10 <sup>9</sup> /L):2.38  |
|    | <i>E. Coli</i>       | Sulperazon                            | <i>A. Baumanii</i> (wound fluid)                | T lymphocyte lymphoma                          | CRP (mg/L):68                  |
|    | <i>Enterococcus</i>  | Isopamicin                            | <i>Enterobacteriaceae</i> (faeces)              | Stomatitis                                     | PCT (µg/L):0.87                |
|    |                      | Fluconazole                           | <i>Enterococcus</i> (faeces)                    |                                                |                                |
| 29 | <i>E. Coli</i>       | Meropenem                             | <i>Enterococcus</i> (faeces)                    | Sepsis                                         | WBC (10 <sup>9</sup> /L):8.78  |
|    |                      | Vancomycin                            | <i>E. coli</i> (faeces)                         | Purulent meningitis                            | CRP (mg/L):153                 |
|    |                      |                                       |                                                 | Pneumonia                                      | PCT (µg/L):55.97               |
| 30 | <i>E. coli</i>       | Amoxicillin and clavulanate potassiun | -                                               | Bronchopnumonia                                | WBC (10 <sup>9</sup> /L):17.95 |
|    |                      |                                       |                                                 |                                                | CRP (mg/L):6                   |
|    |                      |                                       |                                                 |                                                | PCT (µg/L): <0.02              |
| 34 | <i>E. coli</i>       | Sulperazon                            | -                                               | Systemic inflammatory response syndrome (SIRS) | WBC (10 <sup>9</sup> /L):5.43  |
|    |                      | Cefurxim                              |                                                 | Acute lymphadenitis                            | CRP (mg/L):27                  |
|    |                      |                                       |                                                 |                                                | PCT (µg/L): 0.22               |
| 35 | <i>P. Aeruginosa</i> | Sulperazon                            | <i>Haemophilus parainfluenzae</i> (throat swab) | ALL                                            | WBC (10 <sup>9</sup> /L):0.18  |
|    | <i>Enterococcus</i>  | Ornidazole                            | <i>S. viridans</i> (oral fluid)                 |                                                | CRP (mg/L): <5                 |
|    |                      | Caspofungin                           | <i>Neisseria</i> (oral fluid)                   |                                                | PCT (µg/L): 0.03               |
|    |                      | SMZ                                   |                                                 |                                                |                                |
|    |                      | Meropenem                             |                                                 |                                                |                                |
|    |                      | Voriconazole                          |                                                 |                                                |                                |
| 37 | <i>P. Aeruginosa</i> | Sulperazon                            | <i>S. epidermidis</i> (throat swab)             | Pneumonia                                      | WBC (10 <sup>9</sup> /L):2.58  |
|    | <i>E. coli</i>       | Fluconazole                           |                                                 | ALL                                            | CRP (mg/L):25                  |
|    |                      |                                       |                                                 |                                                | PCT (µg/L): 0.14               |
| 41 | <i>A. Baumanii</i>   | Isopamicin                            | -                                               | Intestinal infection                           | WBC (10 <sup>9</sup> /L):0.46  |

|    |                                            |                                                                                                 |                                                                                     |                                                               |                                                                        |
|----|--------------------------------------------|-------------------------------------------------------------------------------------------------|-------------------------------------------------------------------------------------|---------------------------------------------------------------|------------------------------------------------------------------------|
|    | <i>Streptococcus</i>                       | Sulperazon<br>Fluconazole<br>Vancomycin<br>Imipenem<br>SMZ<br>Imipenem and<br>Cilastatin Sodium |                                                                                     | Skin soft-tissue infection                                    | CRP (mg/L):41<br>PCT (µg/L): 0.23                                      |
| 44 | <i>Klebsiella</i><br><i>EBV</i>            | Vancomycin<br>Fluconazole<br>Imipenem                                                           | <i>Neisseria</i> (throat swab)                                                      | Sepsis<br>Hodgkin lymphoma<br>Stomatitis                      | WBC (10 <sup>9</sup> /L):0.3<br>CRP (mg/L):90<br>PCT (µg/L): <0.02     |
| 47 | <i>Klebsiella</i>                          | Sulperazon<br>Fluconazole<br>Ornidazole                                                         | <i>Neisseria</i> (throat swab)<br><i>S. viridans</i> (throat swab)                  | Pneumonia<br>Stomatitis<br>ALL                                | WBC (10 <sup>9</sup> /L):2.13<br>CRP (mg/L): <5<br>PCT (µg/L): 0.1     |
| 48 | <i>Streptococcus</i>                       | Sulperazon                                                                                      | <i>Enterobacteriaceae</i> (faeces)                                                  | Sepsis<br>Intestinal infection<br>ALL                         | WBC (10 <sup>9</sup> /L): -<br>CRP (mg/L): -<br>PCT (µg/L): -          |
| 50 | <i>A. Baumanii</i><br><i>Streptococcus</i> | Meropenem<br>Vancomycin<br>Fluconazole<br>Azithromycin                                          | <i>Serratia marcescens</i> (gastric<br>juice)<br><i>Enterobacteriaceae</i> (faeces) | Sepsis<br>Septic shock<br>Severe pneumonia<br>B-cell lymphoma | WBC (10 <sup>9</sup> /L):5.97<br>CRP (mg/L):165<br>PCT (µg/L): 0.48    |
| 52 | <i>S. aureus</i>                           | Meropenem<br>Vancomycin                                                                         | -                                                                                   | Sepsis<br>Intestinal infection<br>Neuroblastoma               | WBC (10 <sup>9</sup> /L):0.14<br>CRP (mg/L): >160<br>PCT (µg/L): 11.71 |
| 56 | <i>Klebsiella</i>                          | Imipenem and<br>Cilastatin Sodium                                                               | -                                                                                   | Sepsis<br>Pneumonia                                           | WBC (10 <sup>9</sup> /L):14.57<br>CRP (mg/L): 23                       |

|    |                                               |                                                                                                                                  |                                                                  |                                                |                                                                      |
|----|-----------------------------------------------|----------------------------------------------------------------------------------------------------------------------------------|------------------------------------------------------------------|------------------------------------------------|----------------------------------------------------------------------|
|    |                                               | Isopamicin<br>Meropenem<br>Vancomycin<br>Azithromycin<br>Linezolid<br>Ceftriaxone<br>Fluconazole                                 |                                                                  | B-cell lymphoma                                | PCT (µg/L): <0.05                                                    |
| 58 | <i>Klebsiella</i><br><i>EBV</i><br><i>CMV</i> | Sulperazon<br>Fluconazole<br>SMZ<br>Voriconazole<br>Ornidazole<br>Imipenem and<br>Cilastatin Sodium<br>Isopamicin<br>Tigecycline | -                                                                | Pneumonia<br>Acute cholecystitis<br>ALL        | WBC (10 <sup>9</sup> /L):3.68<br>CRP (mg/L): 15<br>PCT (µg/L): 0.1   |
| 60 | <i>Klebsiella</i>                             | Sulperazon<br>Vancomycin                                                                                                         | <i>Enterococcus</i> (faeces)                                     | Sepsis<br>RTI<br>Embryonal<br>rhabdomyosarcoma | WBC (10 <sup>9</sup> /L):1.38<br>CRP (mg/L): 102<br>PCT (µg/L): 1.63 |
| 64 | <i>E. Coli</i>                                | Meropenem<br>Vancomycin                                                                                                          | <i>S. viridans</i> (sputum)                                      | Sepsis<br>Pneumonia<br>Rhabdomyoid tumor       | WBC (10 <sup>9</sup> /L):27.71<br>CRP (mg/L):87<br>PCT (µg/L): 3.61  |
| 73 | <i>Enterococcus</i><br><i>EBV</i>             | Sulperazon<br>Meropenem<br>Voriconazole                                                                                          | <i>S. viridans</i> (throat swab)<br><i>Enterococcus</i> (faeces) | Pneumonia<br>Intestinal infection<br>ALL       | WBC (10 <sup>9</sup> /L):2.2<br>CRP (mg/L): <5<br>PCT (µg/L): 0.14   |

|                                   |                                        |                                |                                                                                                                            |                                                          |                                                                      |
|-----------------------------------|----------------------------------------|--------------------------------|----------------------------------------------------------------------------------------------------------------------------|----------------------------------------------------------|----------------------------------------------------------------------|
| 75                                | <i>Enterococcus</i>                    | SMZ<br>Sulperazon<br>Meropenem | <i>Enterobacteriaceae</i> (faeces)                                                                                         | Chronic superficial<br>gastritis (CSG)<br>ALL<br>RTI     | WBC (10 <sup>9</sup> /L):2.15<br>CRP (mg/L): 133<br>PCT (µg/L): 0.54 |
| <b>Presumptive false-positive</b> |                                        |                                |                                                                                                                            |                                                          |                                                                      |
| 25                                | <i>P. Aeruginosa</i><br><i>E. Coli</i> | Cefuroxim                      | <i>E. faecalis</i> (urine)<br><i>E. coli</i> (urine)<br><i>Enterobacteriaceae</i> (faeces)<br><i>Enterococcus</i> (faeces) | Systemic lupus<br>erythematosus (SLE)<br>Lupus nephritis | WBC (10 <sup>9</sup> /L):6.06<br>CRP (mg/L): <5<br>PCT (µg/L): -     |

## Interference Test

### Validation Protocol

(1) The substances and concentrations of interferences.

| Interfering substance | Final concentration of sample (mg/ml) |
|-----------------------|---------------------------------------|
| Human hemoglobin      | 20                                    |
| Human ferroheme       | 0.2                                   |

Positive templates of the pathogen DNA mix according to P1, P2, P3, P4 and P5 were diluted to 50 copies/µl using distilled water, respectively.

(2) Verification method:

a). Verification of human hemoglobin: 2 ml negative plasma was taken, and added into 3  $\mu$ l (150 copies) positive template P1 or P2, P3, P4, P5 and 20 mg/ml human hemoglobin, respectively. The detection was carried out for 5 times following the manufacturer's instruction.

b). Verification of human ferroheme: 2 ml negative plasma was obtained and added to 150 copies (3  $\mu$ l) positive template P1 or P2, P3, P4, P5, and 0.2 mg/ml of human ferroheme. The detection was performed for 5 times following the manufacturer's instruction.

### Diagnostic Criteria

Repeated detection for five times, and the positive rate of each target is 100%.

### Results

The positive rate of the target was 100% for each ddPCR panel (**Figure S1**).

**Figure S1.** The results of interference test using human hemoglobin and human ferroheme. a). The verification test of interference factors on Panel 1; b). The verification test of interference factors on Panel 2; c). The verification test of interference factors on Panel 3; d). The verification test of interference factors on Panel 4; e). The verification test of interference factors on Panel 5. ROX, ROX channel; VIC, VIC channel; FAM, FAM channel; CY5, CY5 channel; A425, A425 channel.

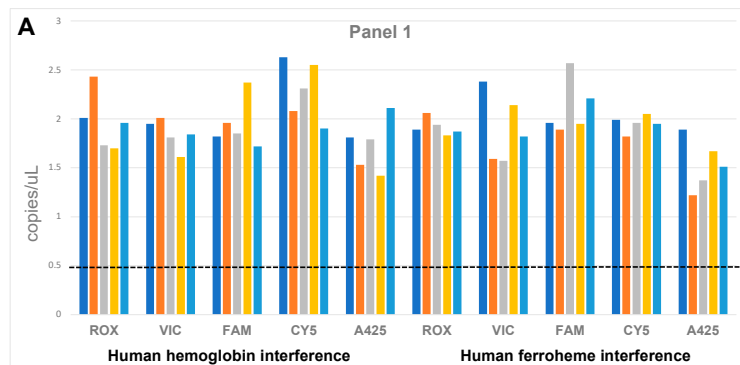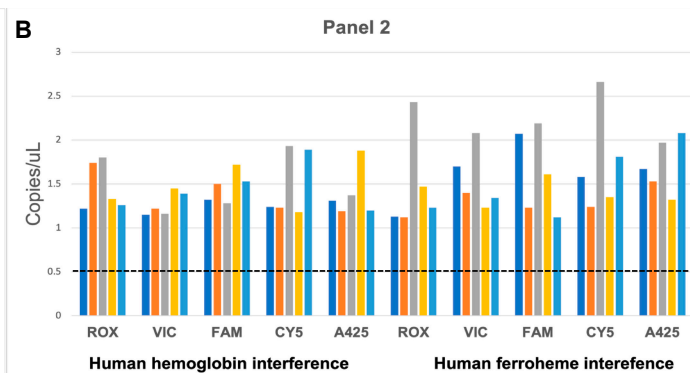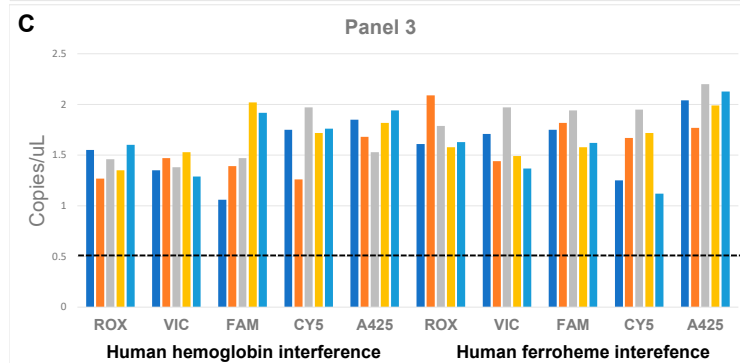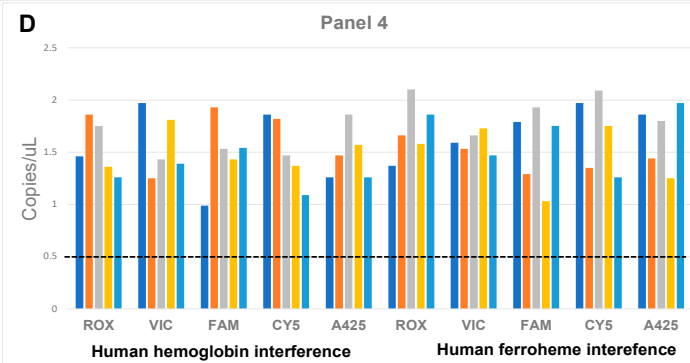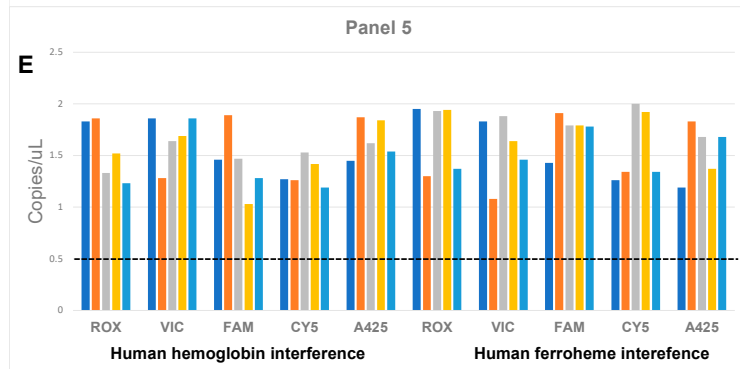



## Conclusion

The detection performance of ddPCR panels were not interfered by with the mixing of human hemoglobin and ferroheme.

## Cross-validation Test

### Validation Protocol

(1) sample:

- a). Positive template P1: DNAs from the standard strains of *Pseudomonas aeruginosa*, *Escherichia coli*, *Klebsiella pneumoniae* and *Acinetobacter baumannii* were extracted and diluted, respectively. Then, the DNAs were mixed and labeled as P1.
- b). Positive template P2: DNAs from the standard strains of *Staphylococcus aureus*, *Candida albicans*, *Enterococcus faecium*, *Streptococcus pneumoniae* and *Staphylococcus epidermidis* were extracted and diluted, respectively. Then, the DNAs were mixed and labeled as P2.
- c). Positive template P3: The synthetic positive plasmids containing *KPC*, *mecA*, *OXA-48*, *NDM*, *IMP*, *vanA*, *vanM* genes were diluted, mixed together, and labeled as P3.
- d). Positive template P4: DNAs from the standard strains of *Salmonella*, *Bacteroides fancilis*, *Listeria monocytogenes*, *Haemophilus influenzae* and

*Morganella mosani* were extracted and diluted, respectively. Then, the DNAs were mixed and labeled as P4.

e). Positive template P5: DNAs from the standard products of HSV-1, VZV, EBV, CMV, HSV-2 were extracted and diluted. All nucleic acids were mixed together and labeled as P5.

(2) Verification method:

Panel 1-5 was used to detect all five positive templates P1, P2, P3, P4 and P5, and the no template control (NTC), respectively.

### Diagnostic Criteria

P1/P2/P3/P4/P5: FAM channel/VIC channel/ROX channel/CY5 channel/A425 channel < 0.5 copies/μl, CY5.5 channel ≥ 50 copies/μl;

Negative quality control products: FAM channel/VIC channel/ROX channel/CY5 channel/A425 channel < 0.5 copies/μl, CY5.5 channel ≥ 50 copies/μl;

Positive quality control products: FAM channel/VIC channel/ROX channel/CY5 channel/A425 channel ≥ 0.5 copies/μl, CY5.5 channel ≥ 50 copies/μl;

### Results

The ddPCR panels detected their corresponding target template, while no signal was observed from the other template DNAs (**Figure S2**).

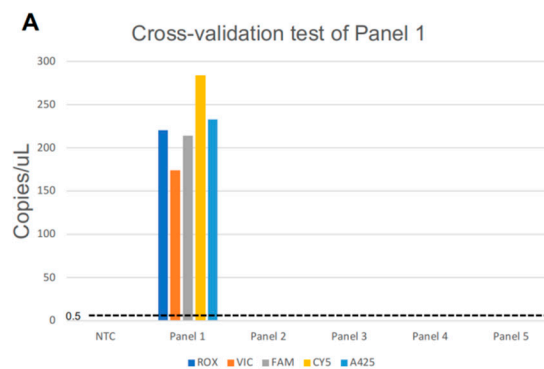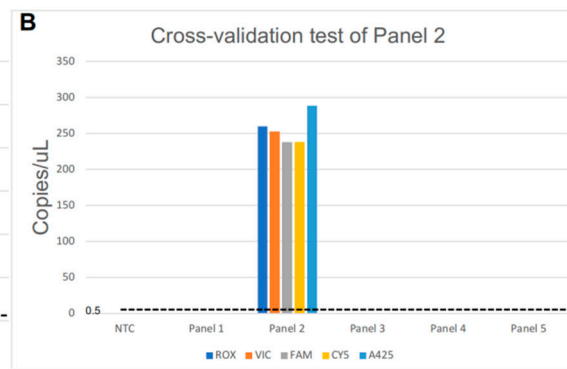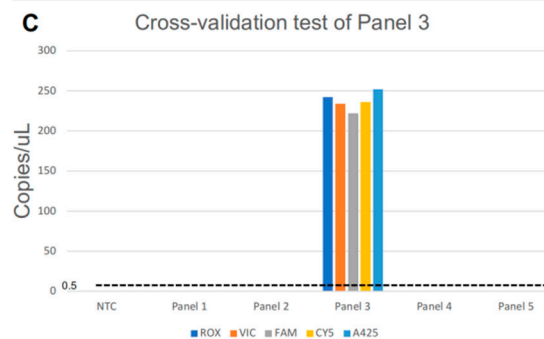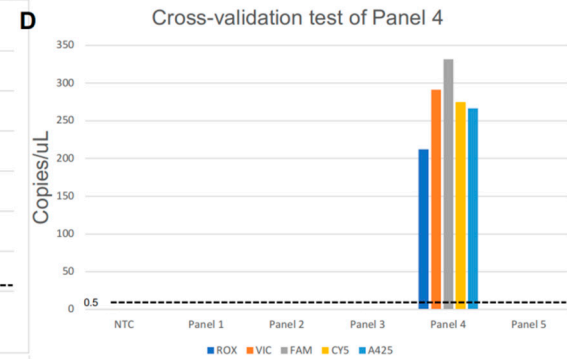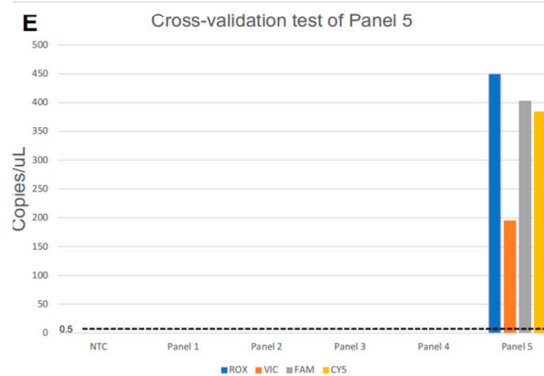

**Figure S2.** The results of cross-validation test. a). Positive template P1 verified other four panels; b). Positive template P2 verified other four panels; c). Positive template P3 verified other four panels; d). Positive template P4 verified other four panels; e). Positive template P5 verified other four panels. ROX, ROX channel; VIC, VIC channel; FAM, FAM channel; CY5, CY5 channel; A425, A425 channel.

## Conclusion

The ddPCR panels can specifically detect their target without cross-reaction.
